# Supplementary material for: Data-driven discovery of carbonyl organic electrode molecules: machine learning and experiment
Source: Royal Society of Chemistry journal article supplement (doi:10.1039/d4ta00136b), 2024-01-01
Supplement: d4ta00136b1.pdf [file d4ta00136b1.pdf]

## Supplementary Information

### Data-Driven Discovery of Carbonyl Organic Electrode Molecules: Machine Learning and Experiment

Jiayi Du,<sup>‡a,b</sup> Jun Guo,<sup>‡a,c</sup> Qiqi Sun,<sup>a,d</sup> Wei Liu,<sup>a</sup> Tong Liu,<sup>\*a,b</sup> Gang Huang<sup>a,b</sup> and Xinbo Zhang<sup>\*a,b</sup>

<sup>a</sup> State Key Laboratory of Rare Earth Resource Utilization, Changchun Institute of Applied Chemistry, Chinese Academy of Sciences, Changchun 130022, PR China.

<sup>b</sup> School of Applied Chemistry and Engineering, University of Science and Technology of China, Hefei 230026, PR China.

<sup>c</sup> School of Materials Science and Engineering, Changchun University of Science and Technology, Changchun 130022, PR China.

<sup>d</sup> National & Local United Engineering Laboratory for Power Battery, Department of Chemistry, Northeast Normal University, Changchun, 130024, PR China

<sup>‡</sup> These authors contributed equally to this work.

\* Corresponding authors and E-mail: [tongliu@ciac.ac.cn](mailto:tongliu@ciac.ac.cn) (TL), [xbzhang@ciac.ac.cn](mailto:xbzhang@ciac.ac.cn) (XZ)

### **Supplementary Note 1: Extracting Database**

PubChem<sup>1</sup> is a freely accessible chemical database including 116 million organic molecules. PubChemPy allows for the download of molecule information from PubChem using the CID number, which serves as the identification key for each molecule within the database. In this study, molecules with CID values ranging from 1 to 1,000,000 were retrieved and presented in the form of simplified molecular input line entry specification (SMILES).

### **Supplementary Note 2: The calculating method of theoretical capacity**

In the selected carbonyl molecules, one carbonyl bond is regarded as an active site. The theoretical capacity (TC, mAh g<sup>-1</sup>) of OEMs is calculated as<sup>2</sup> :

$$TC = \frac{nF}{3.6M_w} \quad \text{Equation S1}$$

where  $n$  is transferred-electron number of one organic molecule,  $F$  is the Faraday constant (C mol<sup>-1</sup>), and  $M_w$  is the molar mass (g mol<sup>-1</sup>) of investigated organic molecule.

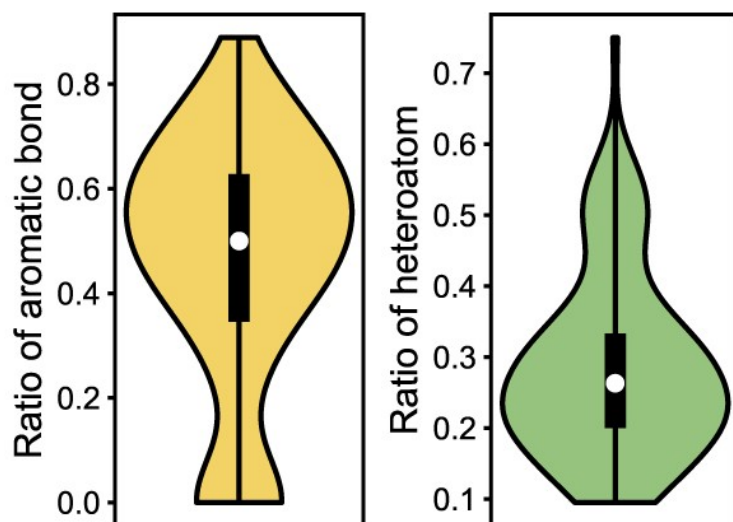

Figure S1. The distribution of aromatic bond ratio and heteroatom ratio in CMDS.

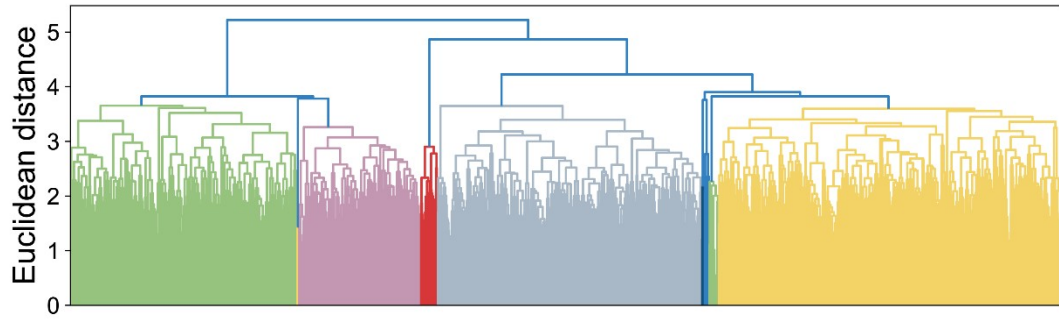

Figure S2. The complete dendrogram of hierarchical clustering for CMDB.

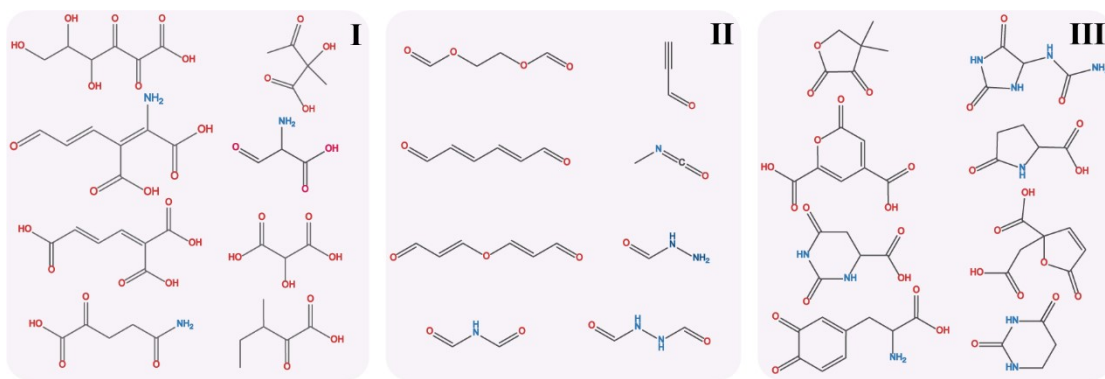

Figure S3. Partial molecules in each of three clusters.

### Supplementary Note 3: High-throughput calculations

In our work, R, defined as the organic electrode molecule, was calculated in four different states, for example, R in gas phase (R(gas)), R in solvation phase (R(sol)), R with one negative charge in gas phase (R<sup>-</sup>(gas)) and R with one negative charge in solvation phase (R<sup>-</sup>(sol)). Figure S4 shows the thermodynamic cycle<sup>3</sup>. The reduction free energy of R(sol) was calculated by Equation S2. The reduction potential ( $E^{red}$ ) was decided by Equation S3, where  $F$  represents the Faraday constant and  $n$  denotes the number of electrons obtained by R(sol) during the reduction process. A constant 1.4 V is derived from the absolute potential of hydrogen electrode (-4.44 V)<sup>4</sup> and the potential of Li/Li<sup>+</sup>, -3.04 V vs. SHE<sup>5</sup>.

The calculations of reduction potential for 1524 molecules were performed by Gaussian 16 software<sup>6</sup>. To strike a balance between computational accuracy and time cost, each molecule/anion was optimized at the wb97xd/6-31+(d, p) level of theory<sup>7</sup>. Meanwhile, the solvation effect was taken into consideration using SMD solvation model.

$$\Delta G^{red}(R, sol) = \Delta G^{red}(R, gas) + \Delta G^{sol}(R^-) - \Delta G^{sol}(R) \quad \text{Equation S2}$$

$$E^{red} = -\frac{\Delta G^{red}(R, sol)}{nF} - 1.4 V \quad \text{Equation S3}$$

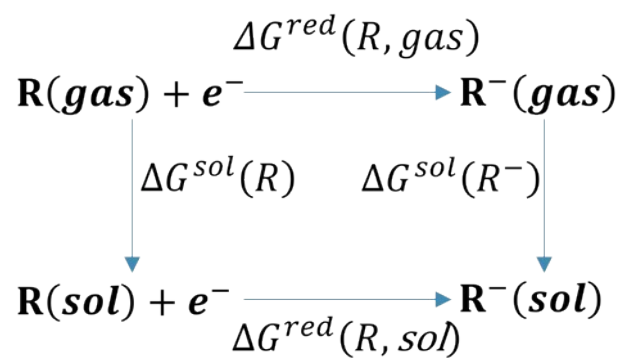

Figure S4. Thermodynamic cycle utilized to calculate the equilibrium reduction potential<sup>3</sup>.

Table S1. The detailed description of SubFPC2, SubFPC3, SubFPC137, SubFPC143, SubFPC274, and SubFPC287<sup>8</sup>.

| SubFingerprintCount | SMARTS Code                                                  | Description               |
|---------------------|--------------------------------------------------------------|---------------------------|
| SubFPC2             | <chem>[CX4H2]([#6])[#6]</chem>                               | Secondary carbon          |
| SubFPC3             | <chem>[CX4H1]([#6])([#6])[#6]</chem>                         | Tertiary carbon           |
| SubFPC137           | <chem>[#6X3](=[OX1])[#6X3]=,[#6X3][#6;!\$(C=[O,N,S])]</chem> | Vinylogous ester          |
| SubFPC143           | <chem>[!#6][#6X3](=[!#6])[!#6]</chem>                        | Carbonic acid derivatives |
| SubFPC274           | a                                                            | Aromatic                  |
| SubFPC287           | <chem>*=[*]=,#,:[*]</chem>                                   | Conjugated double bond    |



Table S2. The selected descriptors.

| Descriptors                       | Bit | Package |
|-----------------------------------|-----|---------|
| SubFPC                            | 22  | Padel   |
| SubFP                             | 22  | Padel   |
| ETA                               | 43  | Padel   |
| Topological charge                | 21  | Padel   |
| BCUT                              | 6   | Padel   |
| MolMR                             | 1   | RDKit   |
| TPSA                              | 1   | RDKit   |
| FractionCSP3                      | 1   | RDKit   |
| HallKierAlpha (HKA)               | 1   | RDKit   |
| Number of valence electrons (NVE) | 1   | RDKit   |
| Max partial charge (MaxPC)        | 1   | RDKit   |
| Min partial charge (MinPC)        | 1   | RDKit   |

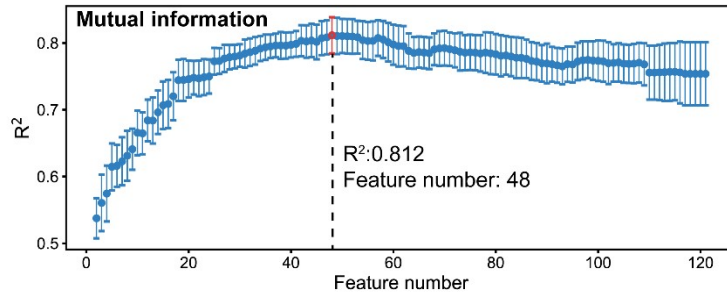

Figure S5. The feature selection based on the **mutual information**.

Table S3. The finally descriptors after the selection of the **mutual information**.

| Descriptor      | Sub-descriptor | MIV         |
|-----------------|----------------|-------------|
| SubFPC          | SubFPC135      | 0.075783291 |
|                 | SubFPC137      | 0.277716782 |
|                 | SubFPC274      | 0.100764289 |
|                 | SubFPC275      | 0.12300611  |
|                 | SubFPC287      | 0.485312071 |
|                 | SubFPC295      | 0.071011697 |
|                 | SubFPC300      | 0.128301604 |
|                 | SubFPC301      | 0.129026096 |
|                 | SubFPC303      | 0.233345082 |
|                 | SubFPC307      | 0.107008915 |
| SubFP           | SubFP137       | 0.191818529 |
|                 | SubFP274       | 0.081706438 |
|                 | SubFP287       | 0.353126043 |
|                 | SubFP303       | 0.086648261 |
| ETA             | ETA_AlphaP     | 0.110638753 |
|                 | ETA_dAlpha_B   | 0.109555779 |
|                 | ETA_Epsilon_1  | 0.098342864 |
|                 | ETA_Epsilon_2  | 0.143255146 |
|                 | ETA_Epsilon_4  | 0.076268085 |
|                 | ETA_dEpsilon_A | 0.134939987 |
|                 | ETA_dEpsilon_B | 0.267286989 |
|                 | ETA_dEpsilon_C | 0.091440932 |
|                 | ETA_Psi_1      | 0.140622332 |
|                 | ETA_dPsi_A     | 0.138031357 |
|                 | ETA_Shape_P    | 0.057991984 |
|                 | ETA_Beta       | 0.173095892 |
|                 | ETA_BetaP      | 0.230217858 |
|                 | ETA_Beta_ns    | 0.215775755 |
|                 | ETA_BetaP_ns   | 0.39029535  |
|                 | ETA_dBeta      | 0.256327942 |
|                 | ETA_dBetaP     | 0.401276238 |
|                 | ETA_Eta_F      | 0.082658742 |
|                 | ETA_EtaP_F     | 0.152589706 |
|                 | ETA_EtaP_L     | 0.170670794 |
| ETA_Eta_F_L     | 0.170169227    |             |
| ETA_EtaP_F_L    | 0.177467244    |             |
| Topology Charge | JGII           | 0.070457046 |
|                 | JGT            | 0.07115601  |
| BCUT            | BCUTw-11       | 0.105666535 |
|                 | BCUTc-11       | 0.259742361 |

|                             |                                |             |
|-----------------------------|--------------------------------|-------------|
|                             | BCUTc-1h                       | 0.158678313 |
| MolMR                       | mr                             | 0.077901658 |
| TPSA                        | tpsa                           | 0.068758274 |
| FractionCSP3                | fracsp3                        | 0.230833695 |
| HallKierAlpha               | hall_kier_alpha (HKA)          | 0.231417502 |
| Number of valence electrons | number_valence_electrons (NVE) | 0.109861894 |
| Max partial charge          | max_partial_charge (MaxPC)     | 0.265835814 |
| Min partial charge          | min_partial_charge (MinPC)     | 0.223576882 |

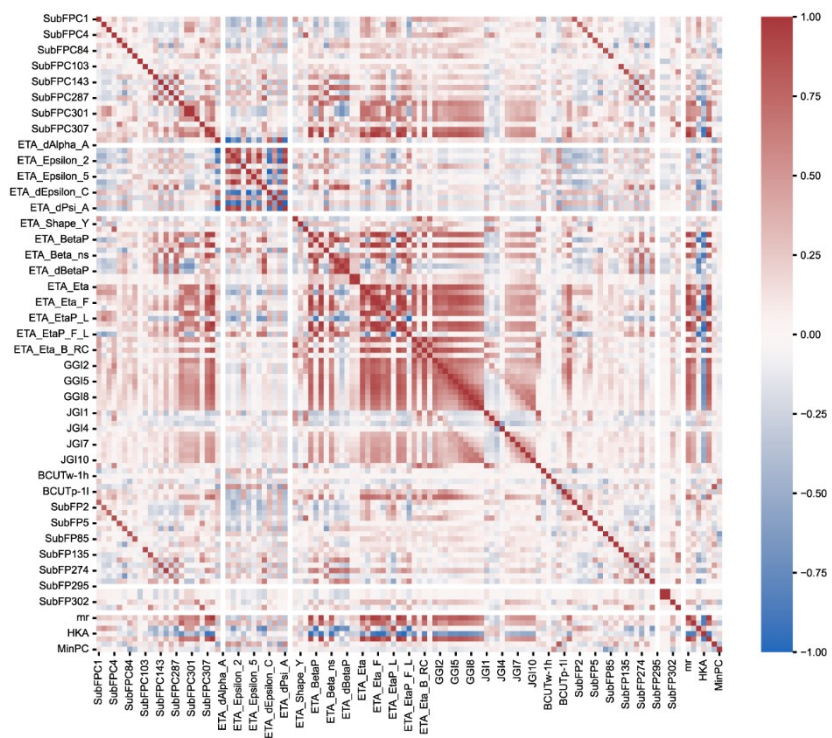

Figure S6. The heat map of Pearson correlation coefficient matrix among the 121 descriptors for OEMs.

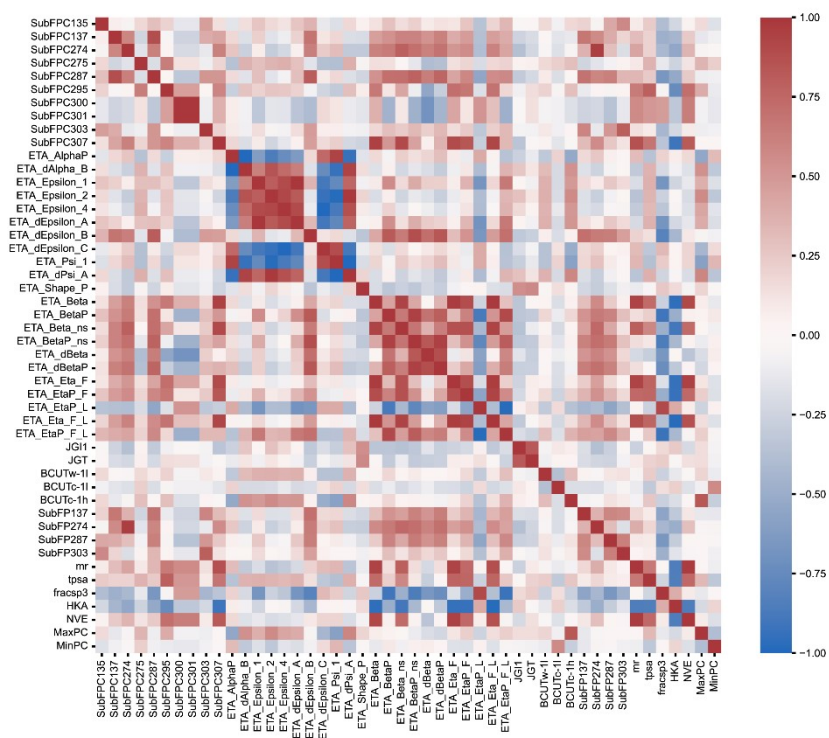

Figure S7. The heat map of Pearson correlation coefficient matrix among the 48 descriptors for OEMs.

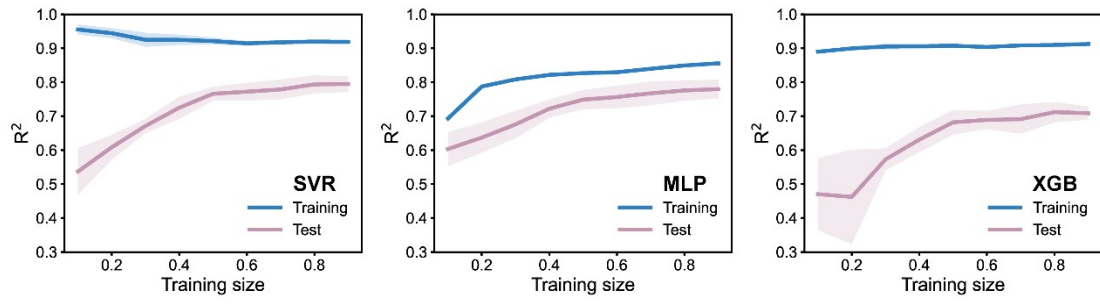

Figure S8. The learning curves of SVR, MLP, and XGB models.

Table S4. The mean absolute error (MAE) and root mean square error (RMSE).

| Model | Task     | MAE   | RMSE  |
|-------|----------|-------|-------|
| SVM   | Training | 0.131 | 0.277 |
|       | Test     | 0.243 | 0.334 |
| MLP   | Training | 0.244 | 0.354 |
|       | Test     | 0.277 | 0.383 |
| XGB   | Training | 0.197 | 0.272 |
|       | Test     | 0.307 | 0.415 |



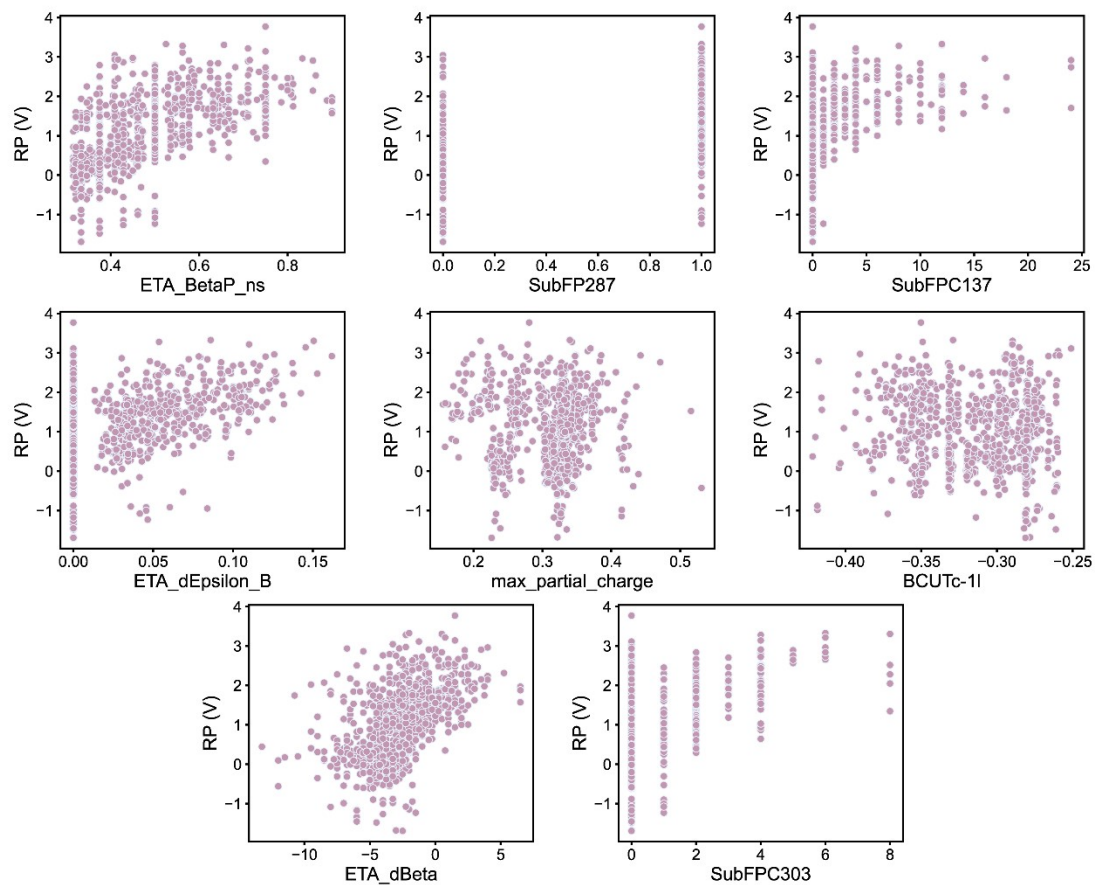

Figure S9. The relationship of RP and other 8 descriptors. The 8 descriptors are ETA\_BetaP\_ns, SubFPC287, SubFPC137, ETA\_dEpsilon\_B, max\_partial\_charge, BCUT-11, ETA\_dBeta, and SubFPC303.

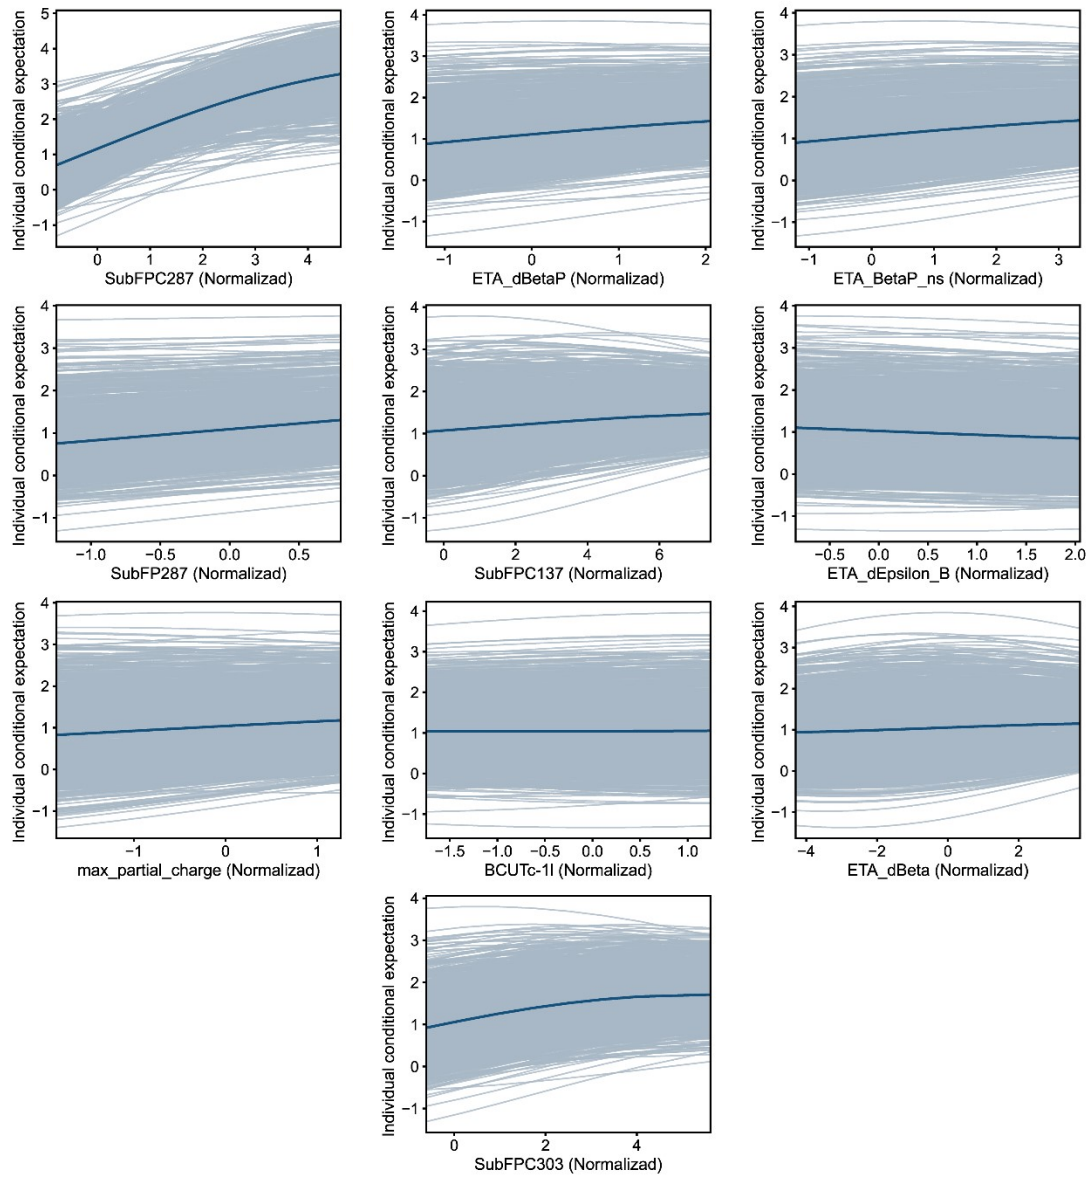

Figure S10. The individual conditional expectation between RP and the top 10 MIV of descriptors.

## **Supplementary Note 5: Experiments**

### **Synthesis of 5,8-dihydroxynaphthalene-1,4-dione (DND)**

The anhydrous  $\text{AlCl}_3$  (1 mmol) and NaCl (0.5 mmol) were added into a Schlenk flask at room temperature and then the mixture was heated till molten. After this, the furan-2,5-dione (0.1 mmol) and hydroquinone (0.1 mmol) were added into the mixture, and the temperature was increased to 180 °C and maintained for 300 min. When cooling down to 0 °C via the ice-water bath, 10% HCl was added, and the mixture was stirred for 30 min and followed by refluxing for 60 min. Finally, the product, DND, was extracted by ethyl acetate and purified by silica gel column chromatography.<sup>9</sup>

### **Characterizations**

NMR were performed on a Bruker AVANCE III 400 WB spectrometer. XPS measurement was carried out with a VG Scientific ESCALAB MKII X-ray photoelectron spectrometer. FTIR measurement were carried out on a Bruker IFS 66V/S spectrometer.

### **Electrochemical measurements**

The electrode was prepared with DND<sup>10</sup>, KB conductive additive, and polytetrafluoroethylene (PTFE) at a weight ratio of 5: 4: 1 by anhydrous ethanol. The mixed slurry was fully ground by ball milling for 20 min, and then rolled into film and pressed on aluminum mesh current collector to obtain the DND cathodes. After this, the DND electrodes were dried overnight in a vacuum oven at 50 °C. The mass loading of DND was controlled at around 0.8 mg cm<sup>-2</sup>. The electrochemical performance of the PNT//Li metal batteries were tested in 2025-type coin cells, and the electrolyte was 1

M LiPF<sub>6</sub> in EC: DMC=1:1 Wt%. Galvanostatic charge–discharge cycling test was performed with a Land CT2001A battery testing system in the voltage range of 1.5-4.2 V (vs. Li/Li+) at room temperature. Electrochemical impedance spectroscopy (EIS) test was carried out by a Biologic VMP3 electrochemical station with coin cells at room temperature.

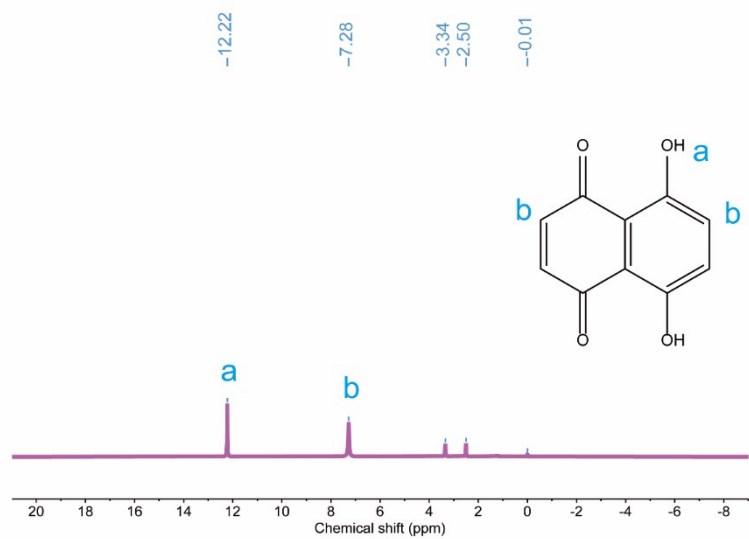

Figure S11.  $^1\text{H}$  NMR ( $\text{DMSO-d}_6$ ) spectrum of DND.

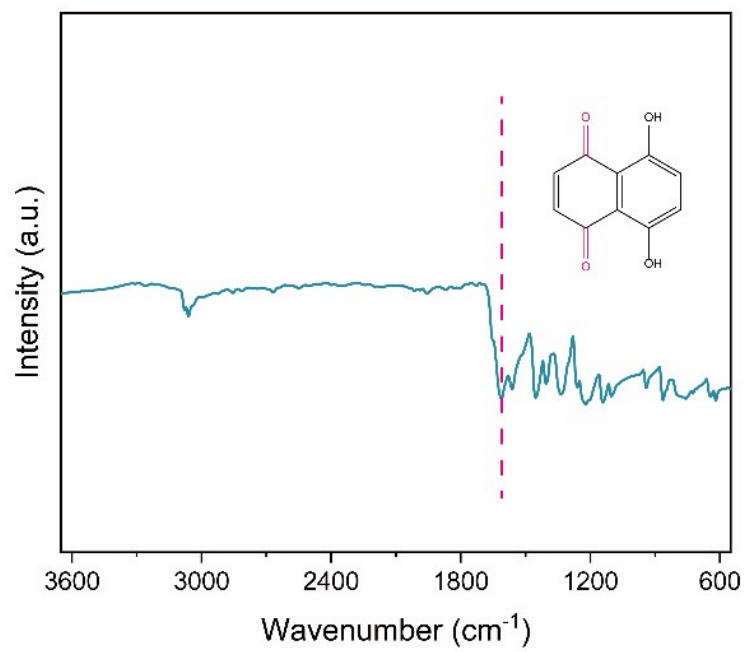

Figure S12. The FTIR spectra of DND.

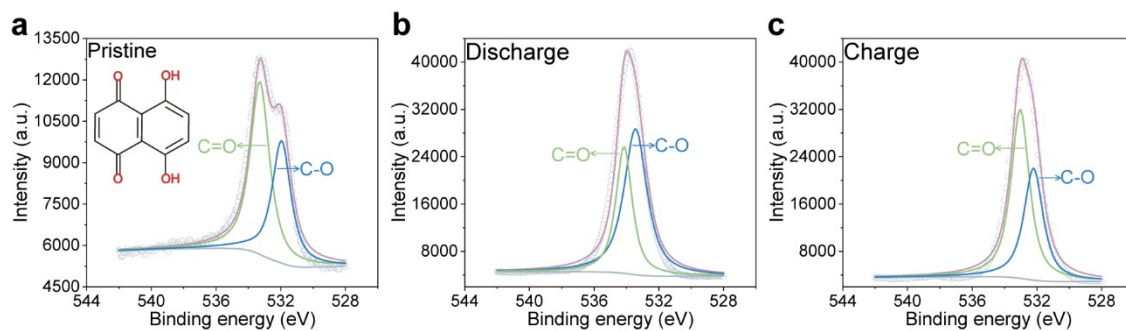

Figure S13. The O 1s XPS spectra of NT cathode. a) The XPS spectra of pristine of NT cathode. b) The XPS spectra of NT cathode after discharging. c) The XPS spectra of NT cathode after charging.

Table S5. The performance comparison of NT with the reported organic carbonyl cathode materials.

| Name                     | Energy density (Wh/kg) | Capacity (mAh/g) | Voltage (V) | Cycle number |
|--------------------------|------------------------|------------------|-------------|--------------|
| C6O6 <sup>11</sup>       | 1533.4                 | 902              | 1.7         | 100          |
| DHCQ <sup>12</sup>       | 460.5                  | 921              | 0.5         | 400          |
| Li2TP <sup>13</sup>      | 346.4                  | 433              | 0.8         | 1000         |
| C4Q <sup>14</sup>        | 1158.05                | 437              | 2.65        | 100          |
| C6Q <sup>15</sup>        | 1012                   | 440              | 2.3         | 300          |
| BBQB <sup>16</sup>       | 917.5                  | 367              | 2.5         | 100          |
| Li-lawsone <sup>17</sup> | 644                    | 280              | 2.3         | 1000         |
| TPB <sup>18</sup>        | 471.5                  | 230              | 2.05        | 100          |
| Li2BZL <sup>19</sup>     | 150                    | 200              | 0.75        | 70           |
| IDT <sup>20</sup>        | 565                    | 226              | 2.5         | 1000         |
| NTCDI <sup>21</sup>      | 342.7                  | 149              | 2.3         | 23           |
| DAAP <sup>22</sup>       | 570                    | 285              | 2           | 400          |
| 2PTCDA <sup>23</sup>     | 300                    | 125              | 2.4         | 200          |
| DBTOP <sup>24</sup>      | 351.396                | 90.8             | 3.87        | 100          |
| LiPHB <sup>25</sup>      | 305.3                  | 86               | 3.55        | 500          |
| H2PDI <sup>26</sup>      | 207                    | 92               | 2.25        | 1000         |
| PDI <sup>27</sup>        | 143                    | 55               | 2.6         | 300          |
| <b>This work</b>         | <b>1277.5</b>          | <b>511</b>       | <b>2.5</b>  | <b>2500</b>  |



## Reference

1. S. Kim, J. Chen, T. Cheng, A. Gindulyte, J. He, S. He, Q. Li, B. A. Shoemaker, P. A. Thiessen, B. Yu, L. Zaslavsky, J. Zhang and E. E. Bolton, *Nucleic Acids Res.*, 2021, **49**, D1388-D1395.
2. Y. Lu, Q. Zhang, L. Li, Z. Niu and J. Chen, *Chem*, 2018, **4**, 2786-2813.
3. Q. Zhang, A. Khetan, E. Sorkun, F. Niu, A. Loss, I. Pucher and S. Er, *Energy Stor. Mater.*, 2022, **47**, 167-177.
4. S. Trasatti, *J. Electroanal. Chem. Interfacial Electrochem.*, 1986, **58**, 955-966.
5. S. J. Yang, X. Y. Qin, R. He, W. Shen, M. Li and L. B. Zhao, *Phys. Chem. Chem. Phys.*, 2017, **19**, 12480-12489.
6. M. J. Frisch, G. W. Trucks, H. B. Schlegel, G. E. Scuseria, M. A. Robb, J. R. Cheeseman, G. Scalmani, V. Barone, G. A. Petersson, H. Nakatsuji, X. Li, M. Caricato, A. V. Marenich, J. Bloino, B. G. Janesko, R. Gomperts, B. Mennucci, H. P. Hratchian, J. V. Ortiz, A. F. Izmaylov, J. L. Sonnenberg, Williams, F. Ding, F. Lipparini, F. Egidi, J. Goings, B. Peng, A. Petrone, T. Henderson, D. Ranasinghe, V. G. Zakrzewski, J. Gao, N. Rega, G. Zheng, W. Liang, M. Hada, M. Ehara, K. Toyota, R. Fukuda, J. Hasegawa, M. Ishida, T. Nakajima, Y. Honda, O. Kitao, H. Nakai, T. Vreven, K. Throssell, J. A. Montgomery Jr., J. E. Peralta, F. Ogliaro, M. J. Bearpark, J. J. Heyd, E. N. Brothers, K. N. Kudin, V. N. Staroverov, T. A. Keith, R. Kobayashi, J. Normand, K. Raghavachari, A. P. Rendell, J. C. Burant, S. S. Iyengar, J. Tomasi, M. Cossi, J. M. Millam, M. Klene, C. Adamo, R. Cammi, J. W. Ochterski, R. L. Martin, K. Morokuma, O. Farkas, J. B. Foresman and D. J. Fox, *Gaussian 16 Rev. C.01*, 2016.
7. G. Agarwal, H. A. Doan, L. A. Robertson, L. Zhang and R. S. Assary, *Chem. Mater.*, 2021, **33**, 8133-8144.
8. C. W. Yap, *J. Comput. Chem.*, 2011, **32**, 1466-1474.
9. J. Zhang, Y. Liu, D. Shi, G. Hu, B. Zhang, X. Li, R. Liu, X. Han, X. Yao and J. Fang, *Eur. J. Med. Chem.*, 2017, **140**, 435-447.
10. V. P. Papageorgiou, A. N. Assimopoulou, E. A. Couladouros, D. Hepworth and K. C. Nicolaou, *Angew. Chem., Int. Ed.*, 1999, **38**, 270-301.
11. Y. Lu, X. Hou, L. Miao, L. Li, R. Shi, L. Liu and J. Chen, *Angew. Chem., Int. Ed.*, 2019, **58**, 7020-7024.
12. L. Chen, S. Liu, L. Zhao and Y. Zhao, *Electrochim. Acta*, 2017, **258**, 677-683.
13. S. Zhang, S. Ren, D. Han, M. Xiao, S. Wang and Y. Meng, *J. Power Sources*, 2019, **438**.
14. W. Huang, M. Zhang, H. Cui, B. Yan, Y. Liu and Q. Zhang, *Chem. - Asian J.*, 2019, **14**, 4164-4168.
15. W. Huang, X. Zhang, S. Zheng, W. Zhou, J. Xie, Z. Yang and Q. Zhang, *Sci. China Mater.*, 2019, **63**, 339-346.
16. J. Yang, P. Xiong, Y. Shi, P. Sun, Z. Wang, Z. Chen and Y. Xu, *Adv. Funct. Mater.*, 2020, **30**, 109597.
17. J. Lee and M. J. Park, *Adv. Energy Mater.*, 2017, **7**, 1602279.
18. Z. Luo, L. Liu, Q. Zhao, F. Li and J. Chen, *Angew. Chem., Int. Ed.*, 2017, **56**, 12561-12565.

19. V. Medabalmi and K. Ramanujam, *J. Electrochem. Soc.*, 2017, **164**, A1720-A1725.
20. H. Zhang, R. Zhang, F. Ding, C. Shi and N. Zhao, *Energy Stor. Mater.*, 2022, **51**, 172-180.
21. S. More, N. Khupse, M. Bhosale, J. Ambekar, M. Kulkarni and B. Kale, *ChemistrySelect*, 2020, **5**, 2157-2163.
22. H. Peng, P. Chen, X. Yang, Z. Xue, S. Wang, J. Na, J. Yu and Y. Yamauchi, *J. Mater. Chem. A*, 2020, **8**, 11521-11528.
23. Y. Hong, J. Hu, W. Tang, B. Wei, M. Guo, S. Jia and C. Fan, *Energy Stor. Mater.*, 2022, **52**, 61-68.
24. Y. Zheng, H. Ji, J. Liu, Z. Wang, J. Zhou, T. Qian and C. Yan, *Nano Lett.*, 2022, **22**, 3473-3479.
25. M. Rajesh, F. Dolhem, C. Davoisne and M. Becuwe, *ChemSusChem*, 2020, **13**, 2364-2370.
26. V. Medabalmi and K. Ramanujam, *ChemistrySelect*, 2018, **3**, 10657-10662.
27. J. Aher, A. Graefenstein, G. Deshmukh, K. Subramani, B. Krueger, M. Haensch, J. Schwenzel, K. Krishnamoorthy and G. Wittstock, *ChemElectroChem*, 2020, **7**, 1160-1165.
